# Supplementary material for: RNA-Seq Analysis of a Soybean Near-Isogenic Line Carrying Bacterial Leaf Pustule-Resistant and -Susceptible Alleles
Source: PubMed Central journal article supplement — DNA Res. 2011 Oct 10;18(6):483–97. doi: 10.1093/dnares/dsr033 (PMC3223079; doi:10.1093/dnares/dsr033), 2011-10-10

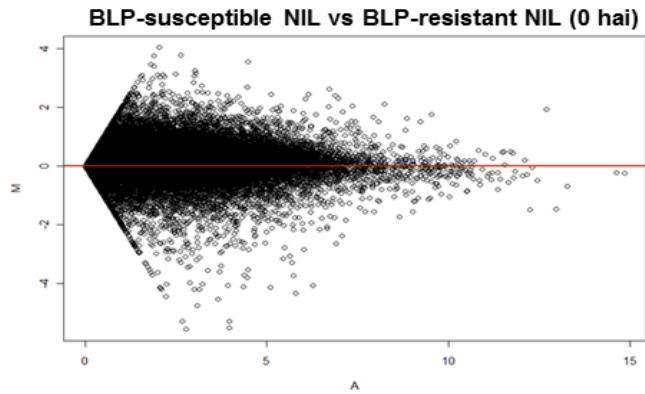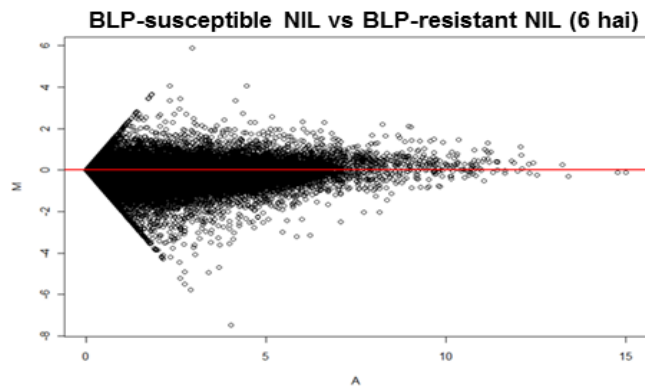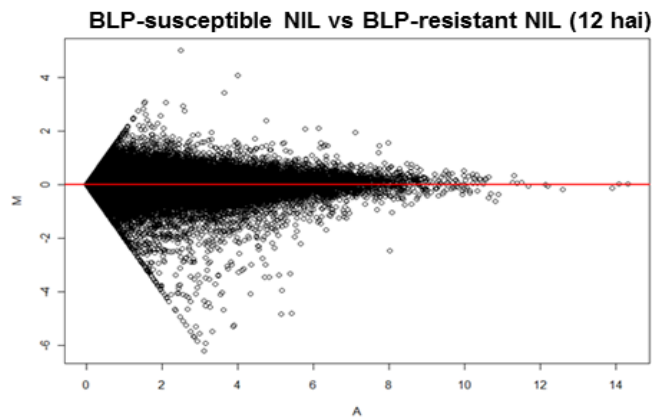

**Supplementary Figure S1.** DEGseq plots. The 3 graphs indicate no variation among sampling times, supporting the random sampling model.

**A) EFR- and FLS2-like *G. max* genes**

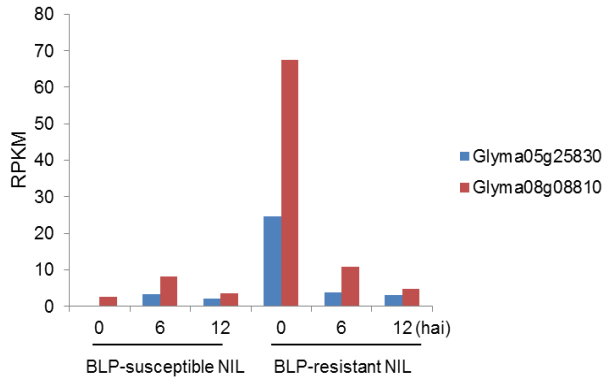

**B) RBOHA-, C-, D-, F-like *G. max* gene**

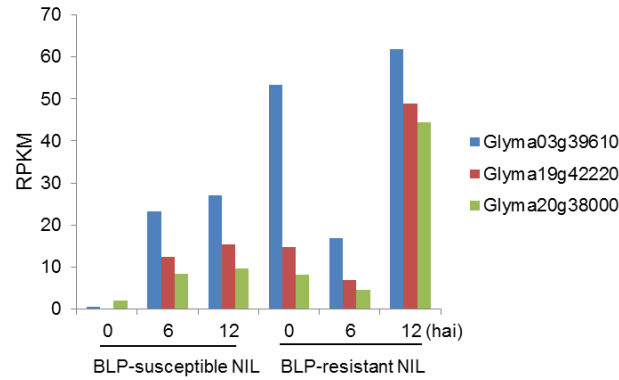

**C) ACA4- and 11-like *G. max* gene**

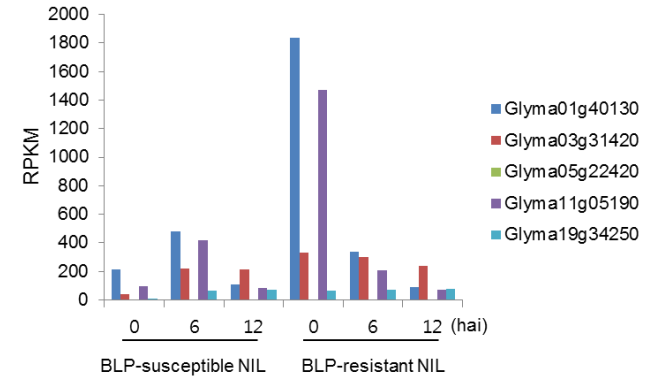

**D) MPK4- and 6-like *G. max* gene**

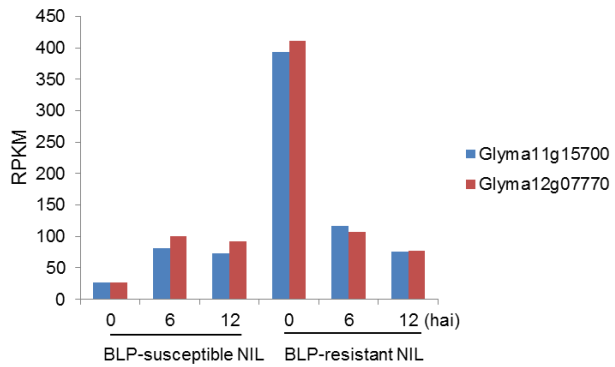

**E) PEPR1- and 2-like *G. max* genes**

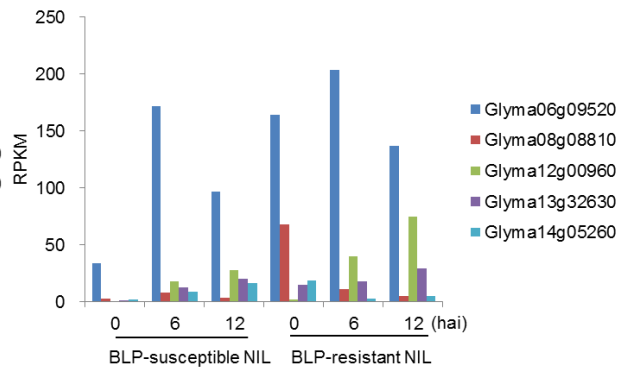

**Supplementary Figure S2.** Comparison of expression levels of PTI-related genes between the BLP-susceptible and BLP-resistant NILs.

### A) RPP1-,4-, and 5-like *G. max* gene

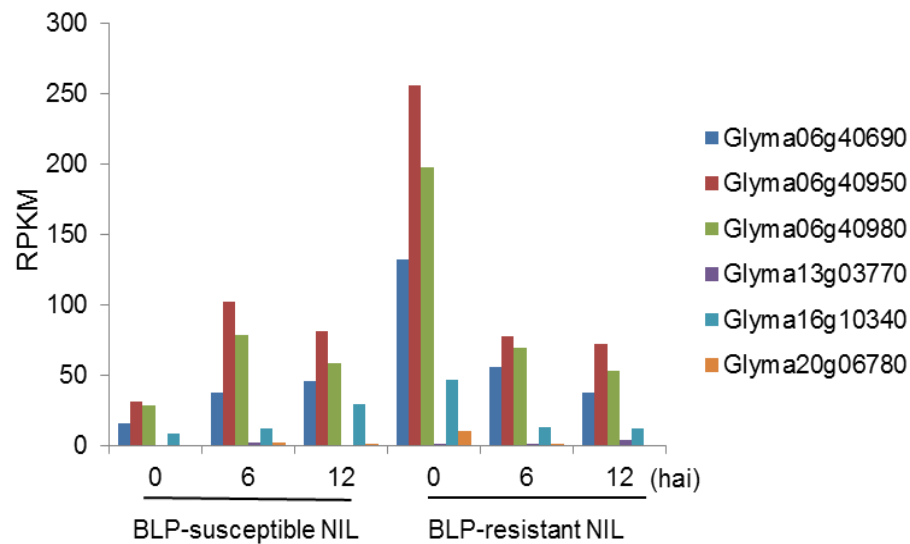

### B) RPM1-like *G. max* gene

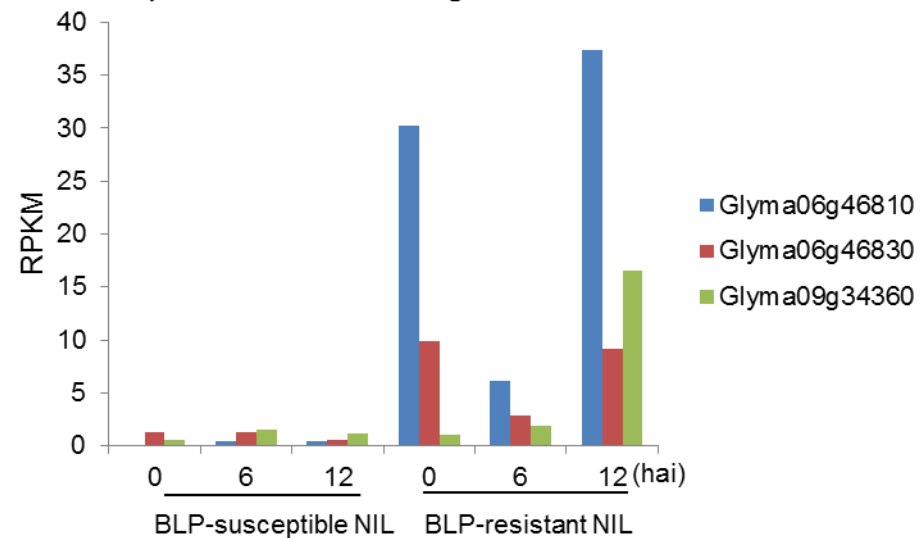

### C) HS1<sup>Pro-1</sup>-like *G. max* genes

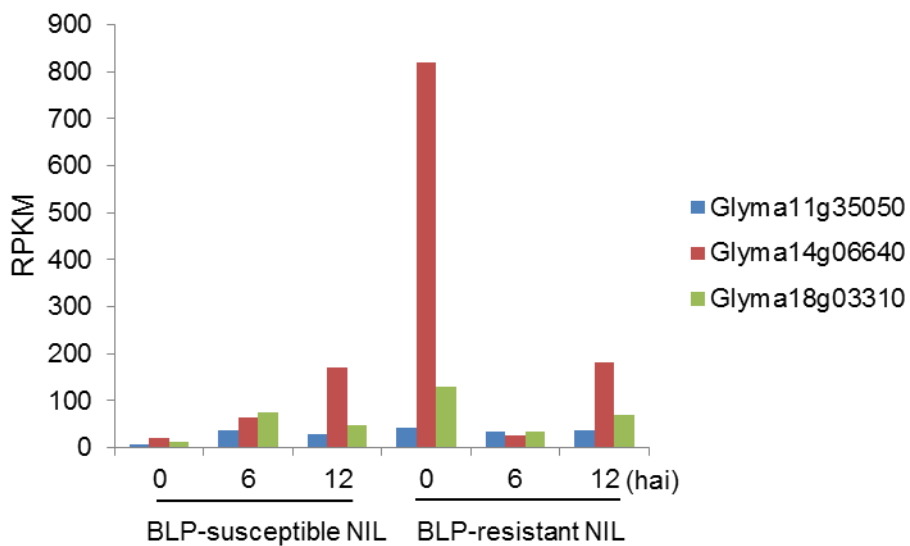

### D) MLO-like *G. max* genes

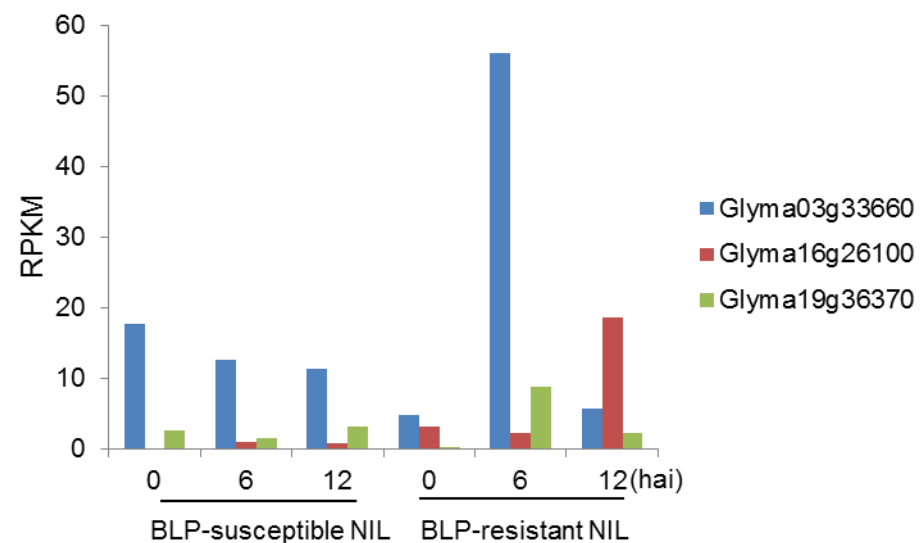

**Supplementary Figure S3.** Comparison of transcript levels of ETI-related genes between the BLP-susceptible and BLP-resistant NILs.

**A) WRKY33-like *G. max* genes**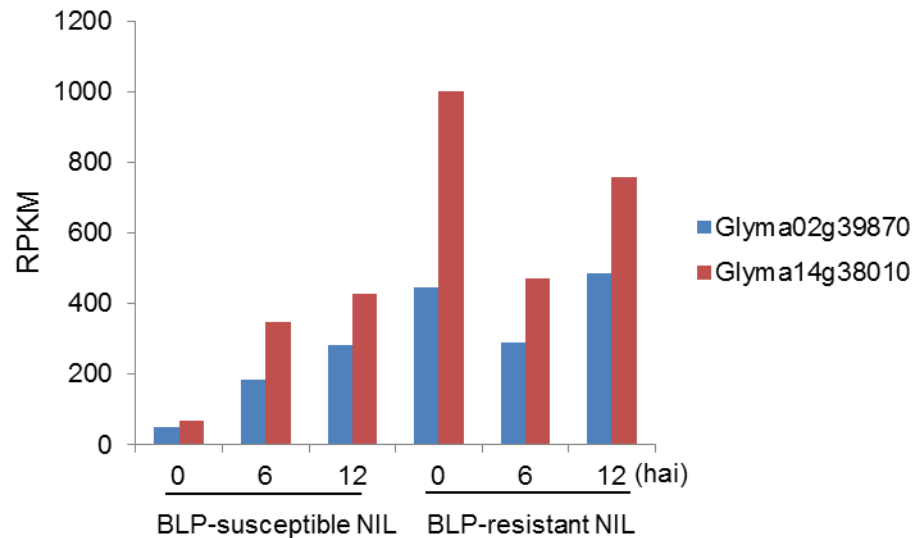**B) LOX1-like *G. max* genes**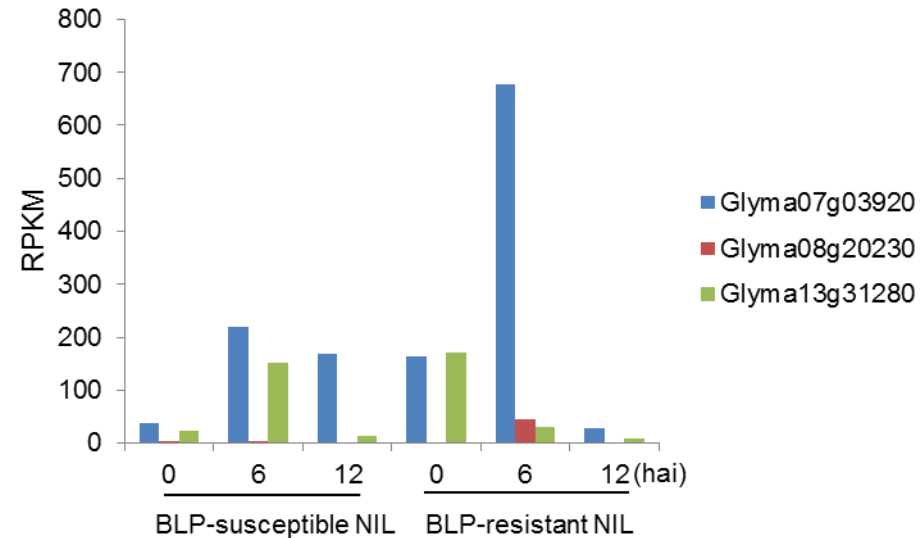**C) SYP121- and 122-like *G. max* genes**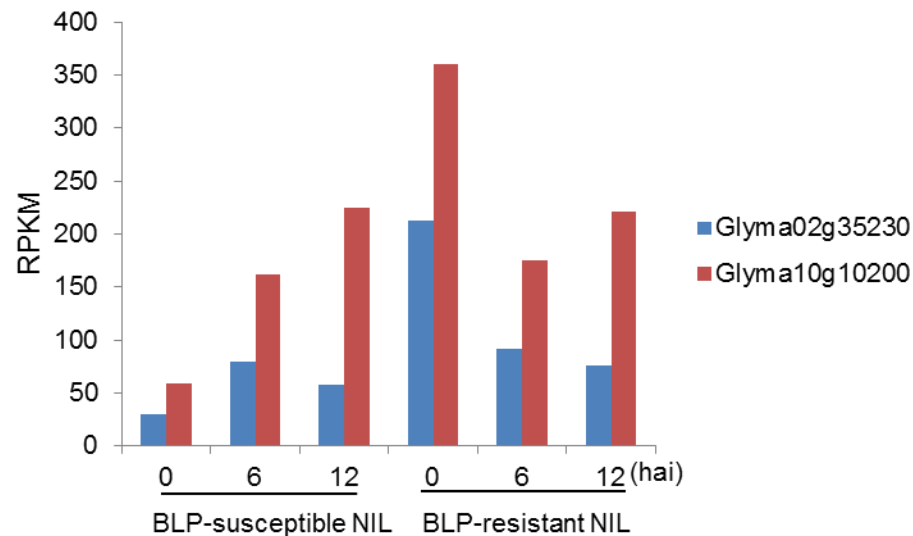**D) MYC2-like *G. max* genes**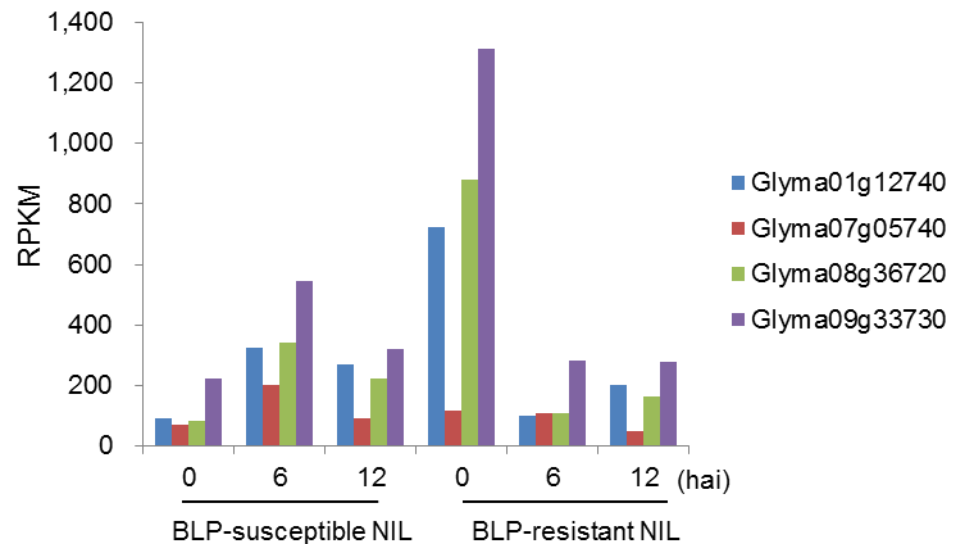

**Supplementary Figure S4.** Comparison of expression levels of defense-related genes in between the BLP-susceptible and BLP-resistant NILs.

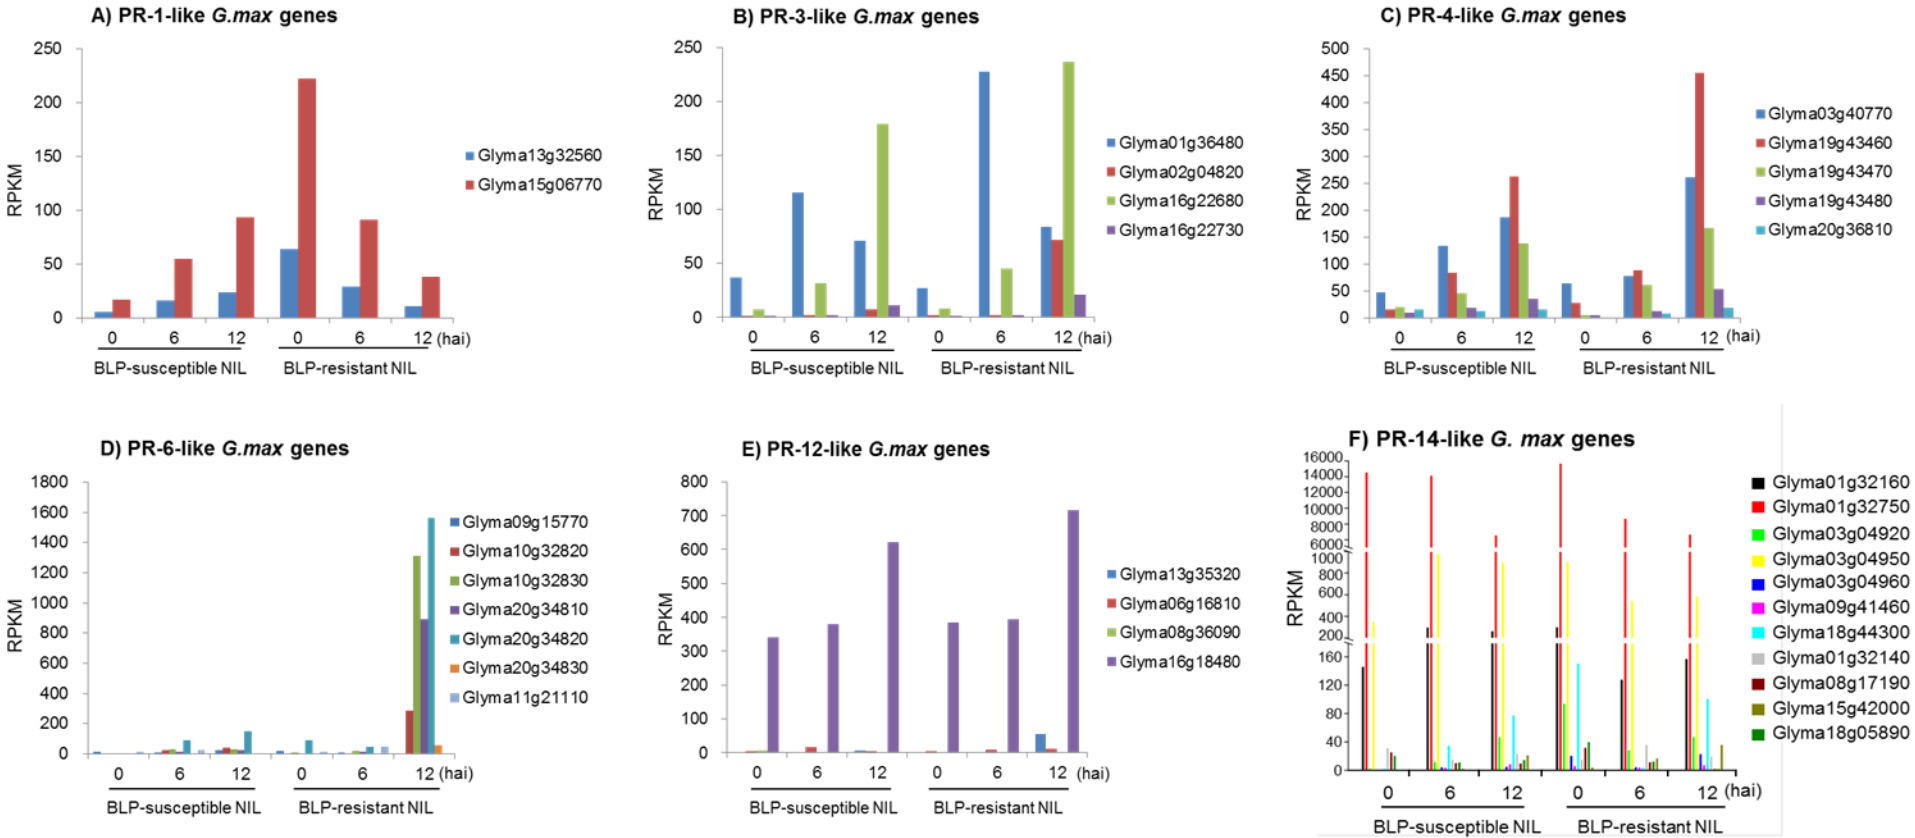

**Supplementary Figure S5.** Comparison of expression levels of pathogenesis-related genes between the BLP-susceptible and BLP-resistant NILs.

**A) NPR1-like *G.max* gene**

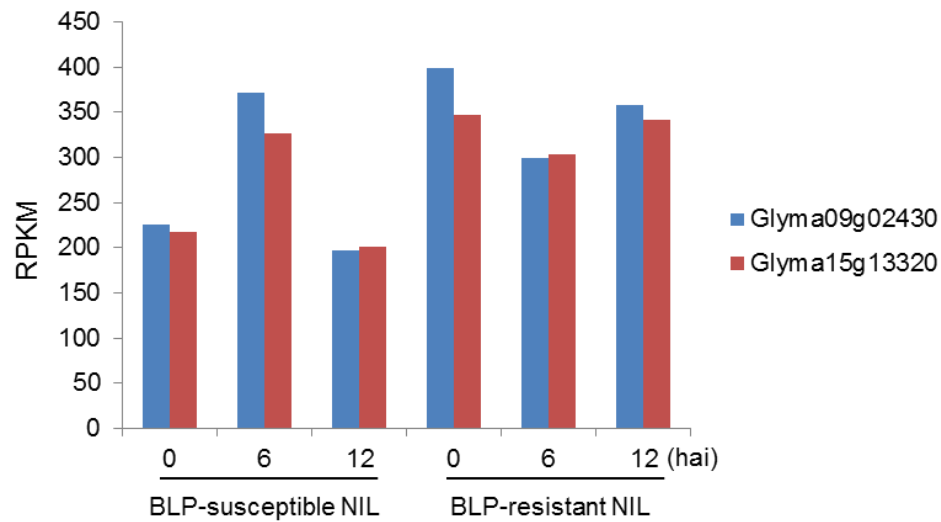

**B) ICS1-like *G.max* gene**

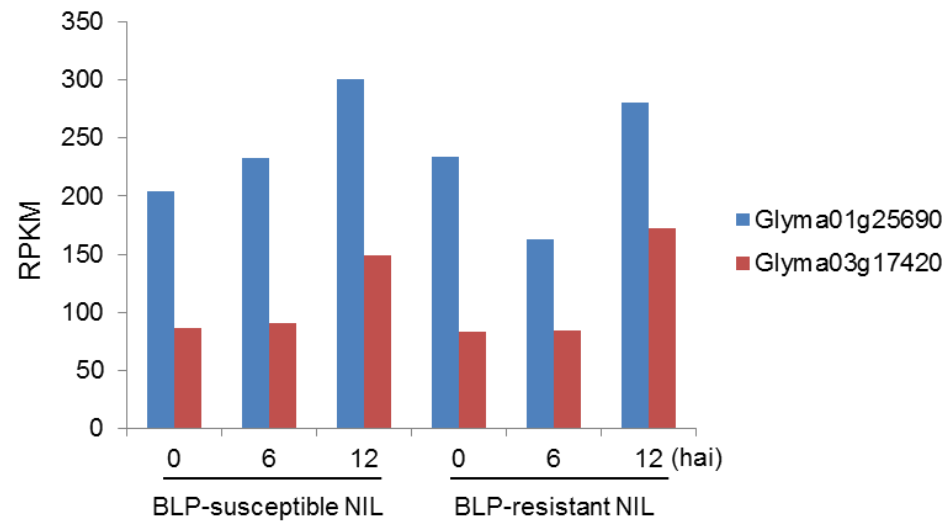

**C) EDS1-like *G.max* gene**

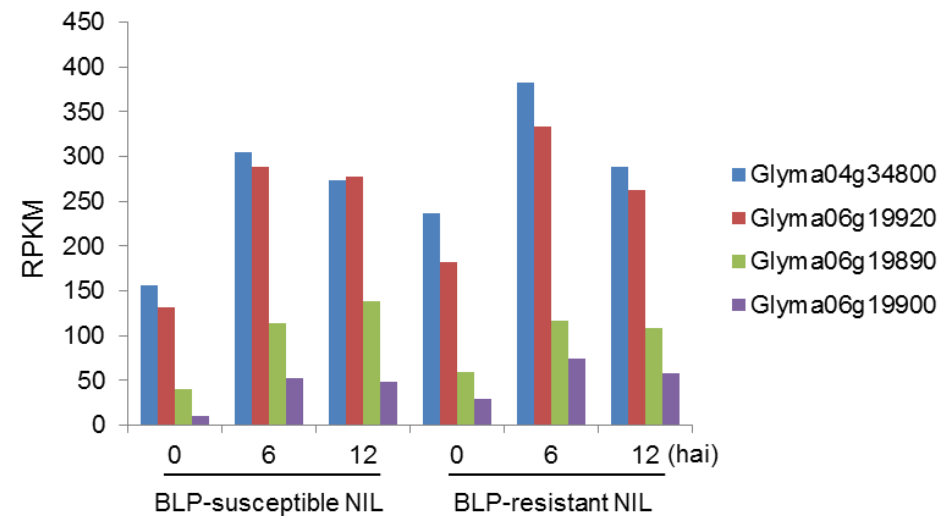

**D) EDS5-like *G.max* gene**

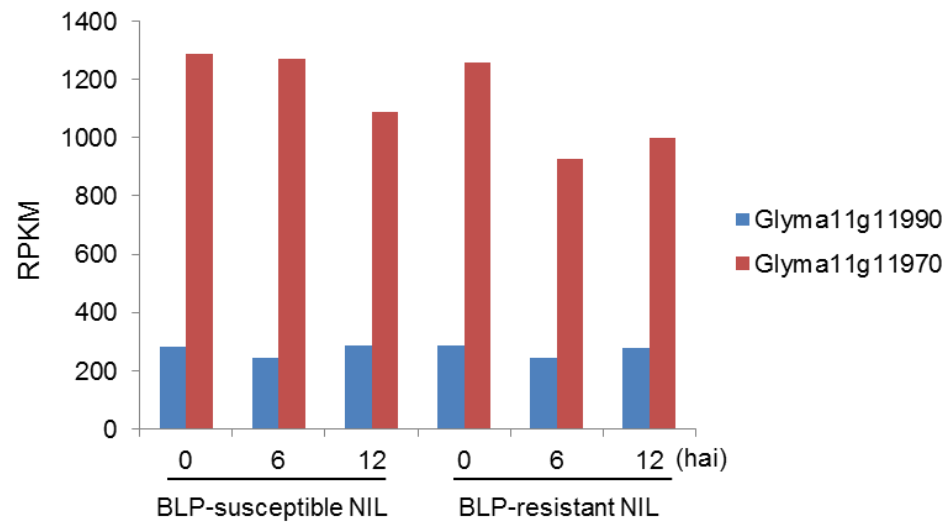

**Supplementary Figure S6.** Comparison of expression levels of SA pathway-related genes between the BLP-susceptible and BLP-resistant NILs.

### A) JAR1-like *G.max* genes

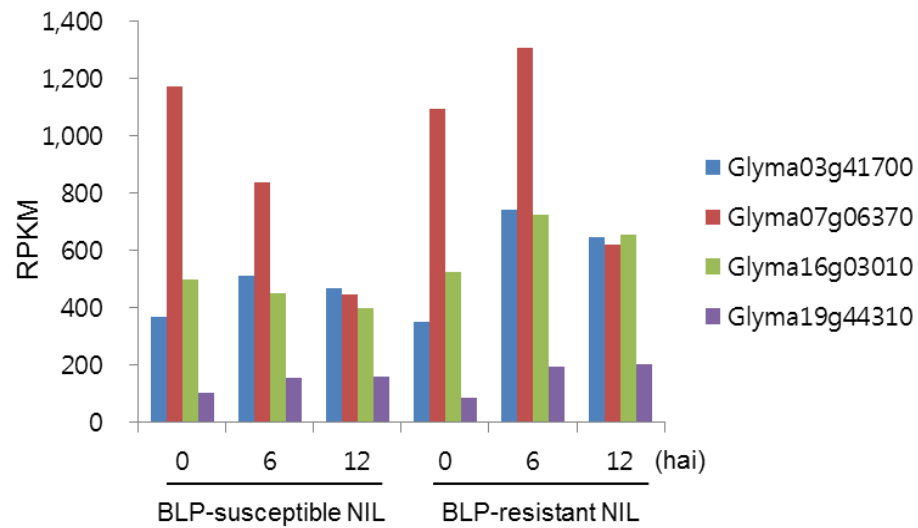

### B) COI1-like *G.max* genes

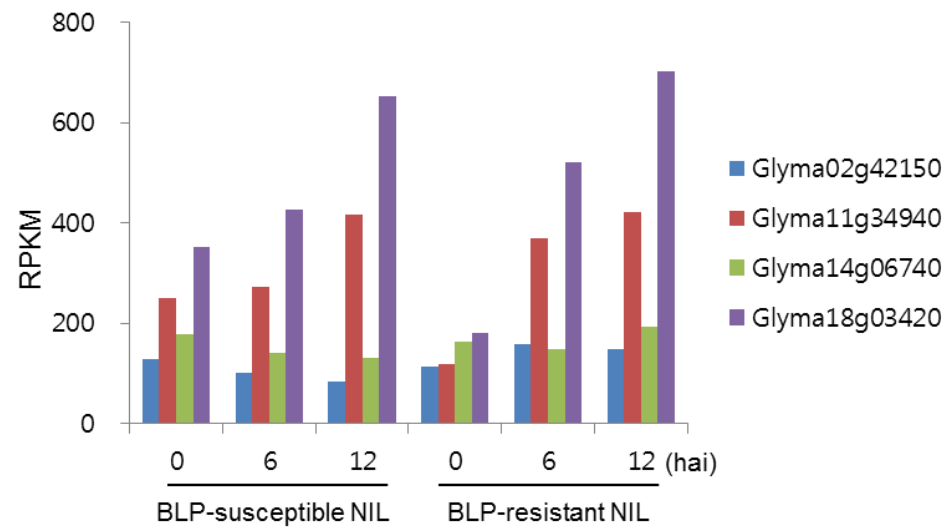

### C) JAZ1-like *G.max* genes

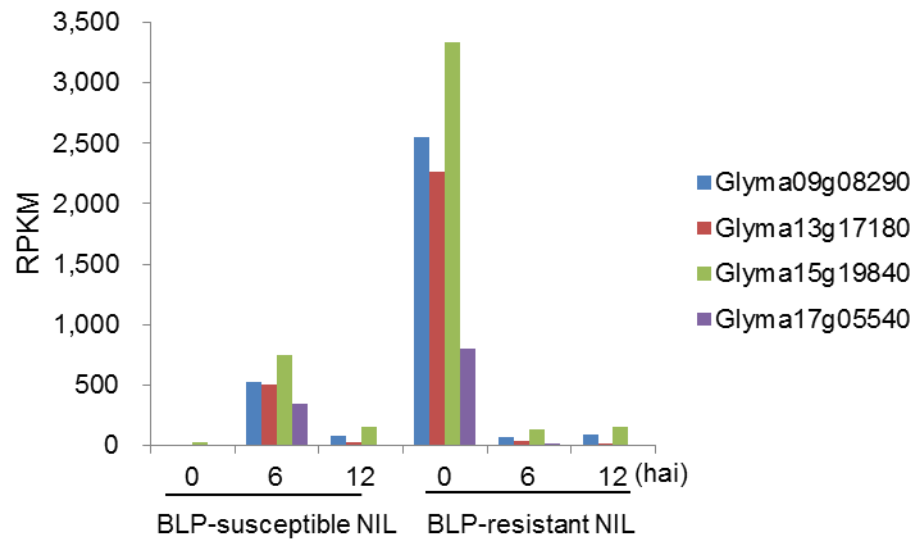

### D) JAZ3-like *G.max* genes

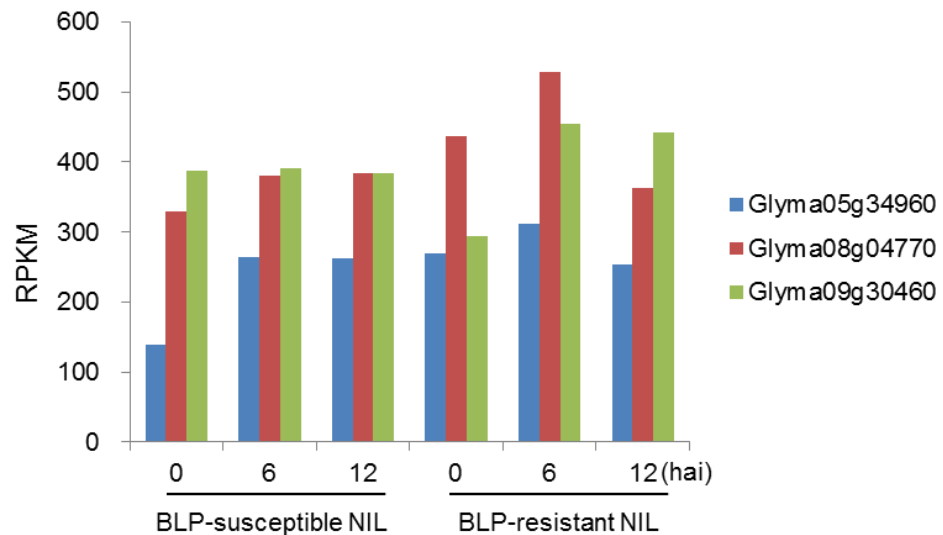

**Supplementary Figure S7.** Comparison of expression levels of JA pathway-related genes between the BLP-susceptible and BLP-resistant NILs.

### E) JAZ4-like *G.max* genes

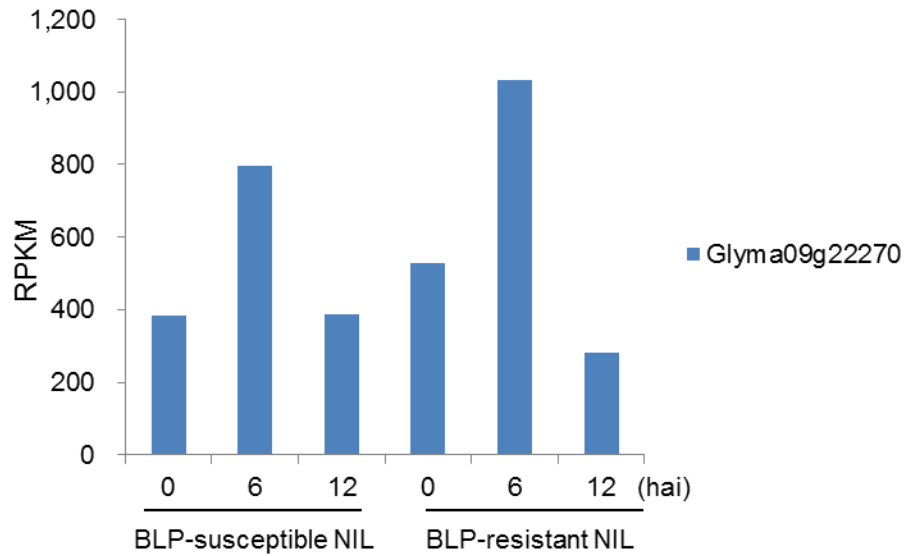

### F) JAZ6-like *G.max* genes

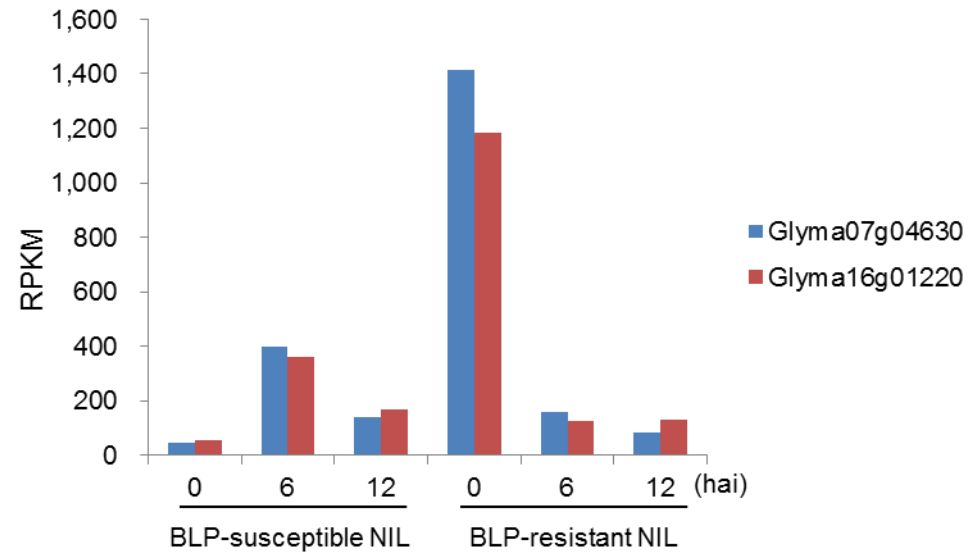

### G) JAZ8-like *G.max* genes

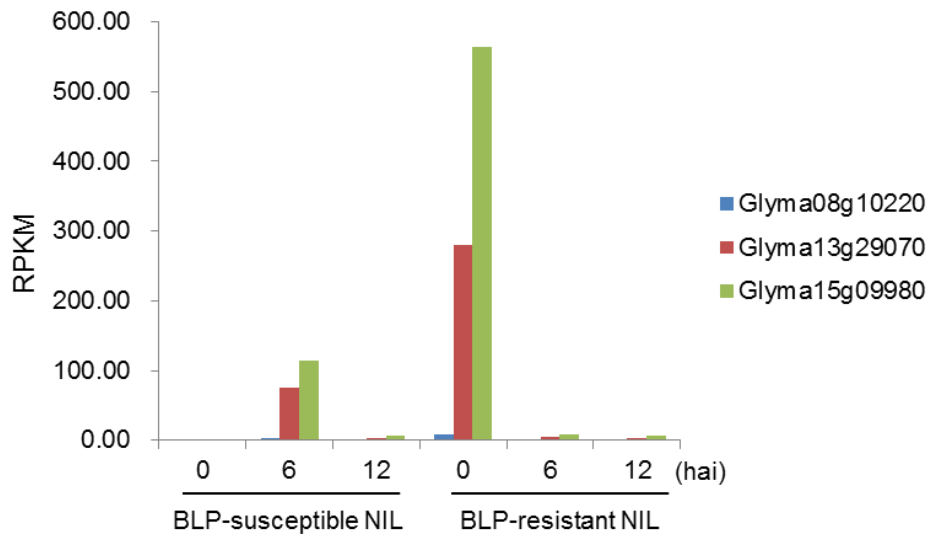

### H) JAZ12-like *G.max* genes

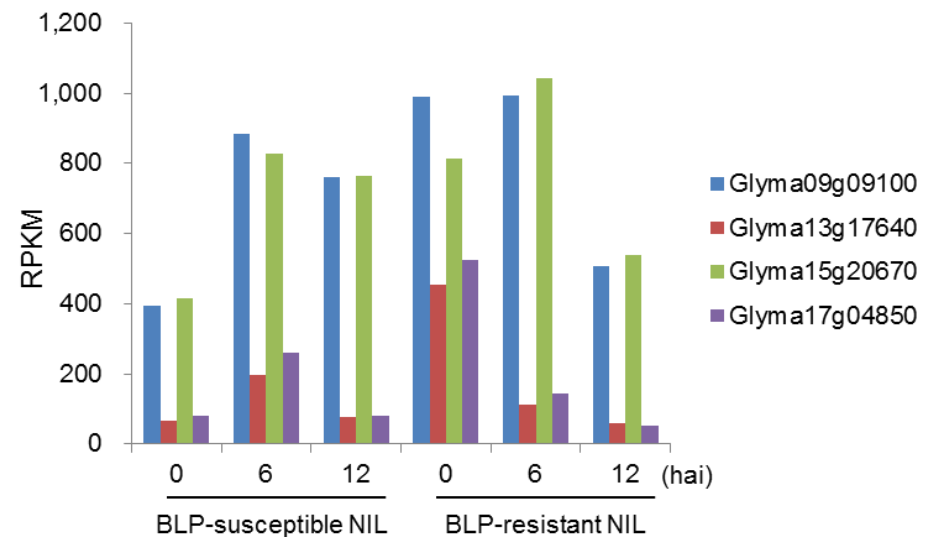

Supplement: supp_dsr033_dsr033supp_figs.pdf [file supp_dsr033_dsr033supp_figs.pdf]
